# Supplementary material
Source: publisher figshare collection journal article supplement (https://springernature.figshare.com/ndownloader/files/21945621)
Supplement: Supplementary file 1 [file 21945621]

## Sheet: Figure 1B
Figure 1B	anti-Flag

## Sheet: Figure 1C
Figure 1C	anti-MHV S (AO4)

## Sheet: Figure 1D
Figure 1D	anti-SARS-CoV S1 polyclonal antibodies

## Sheet: Figure 1E
Figure 1E	anti-SARS-CoV S1 monoclonal antibodies

## Sheet: Figure 1F
Figure 1F	anti-MERS-CoV S2 monoclonal antibodies

## Sheet: Figure 1G
Figure 1G	anti-Flag

## Sheet: Figure 1H
Figure 1H	anti-MHV-S (AO4)

## Sheet: Figure 1I
Figure 1I	anti-SARS-CoV S1 polyclonal antibodies

## Sheet: Figure 1J
Figure 1J	anti-HIV-1 p24

## Sheet: Figure 2A
Figure 2A		Mock			SARS-CoV-2 S			SARS-CoV S			VSV-G
	MRC5	8736	1256	692	7964	5832	788	464	4696	6456	57219840	50978830	44271950
	Huh7	7320	4968	6144	56668	85976	68660	149016	99408	111704	97537540	95166930	93235650
	A549	2352	1460	3248	6792	964	4464	256	708	872	57854700	59924320	67881140
	VERO81	568	7556	8564	18680	94212	91708	6868	5904	5976	5787188	5765688	6183756
	VEROE6	2900	3744	372	1644	1244	15136	212	2004	4204	113000000	113000000	112000000
	HeLa	3112	2312	3348	3148	9464	5120	2324	3412	41624	29510650	30792980	33065780
	293	33000	48128	31236	99348	52040	27480	191688	143592	149288	90282350	91129820	92351660
	RS	6264	972	16352	592	244	1948	1744	396	6976	11805620	12392420	13606360
	LLCMK2	5868	11508	900	17332	20728	24044	32444	951576	476176	10227630	9037972	9071880
	Calu3	288	760	112	220660	302640	219376	114768	115524	140524	2719996	2678848	3179940

[truncated: 19 more sheets: Figure 2B, Figure 2D, Figure 3A, Figure 3B, Figure 3C, Figure 3D, Figure 3E, Figure 3F, Figure 4A, Figure 4C, Figure 4D, Figure 4E, Figure 5B, Figure 5E, Figure 6A, Figure 6B, Table 1, Supplementary Figure 1, Supplementary Figure 3]
